# Supplementary material for: Hypoxia-induced AFAP1L1 regulates pathological neovascularization via the YAP-DLL4-NOTCH axis
Source: Springer Nature journal article supplement (doi:10.1186/s12967-023-04503-x), 2023-09-22

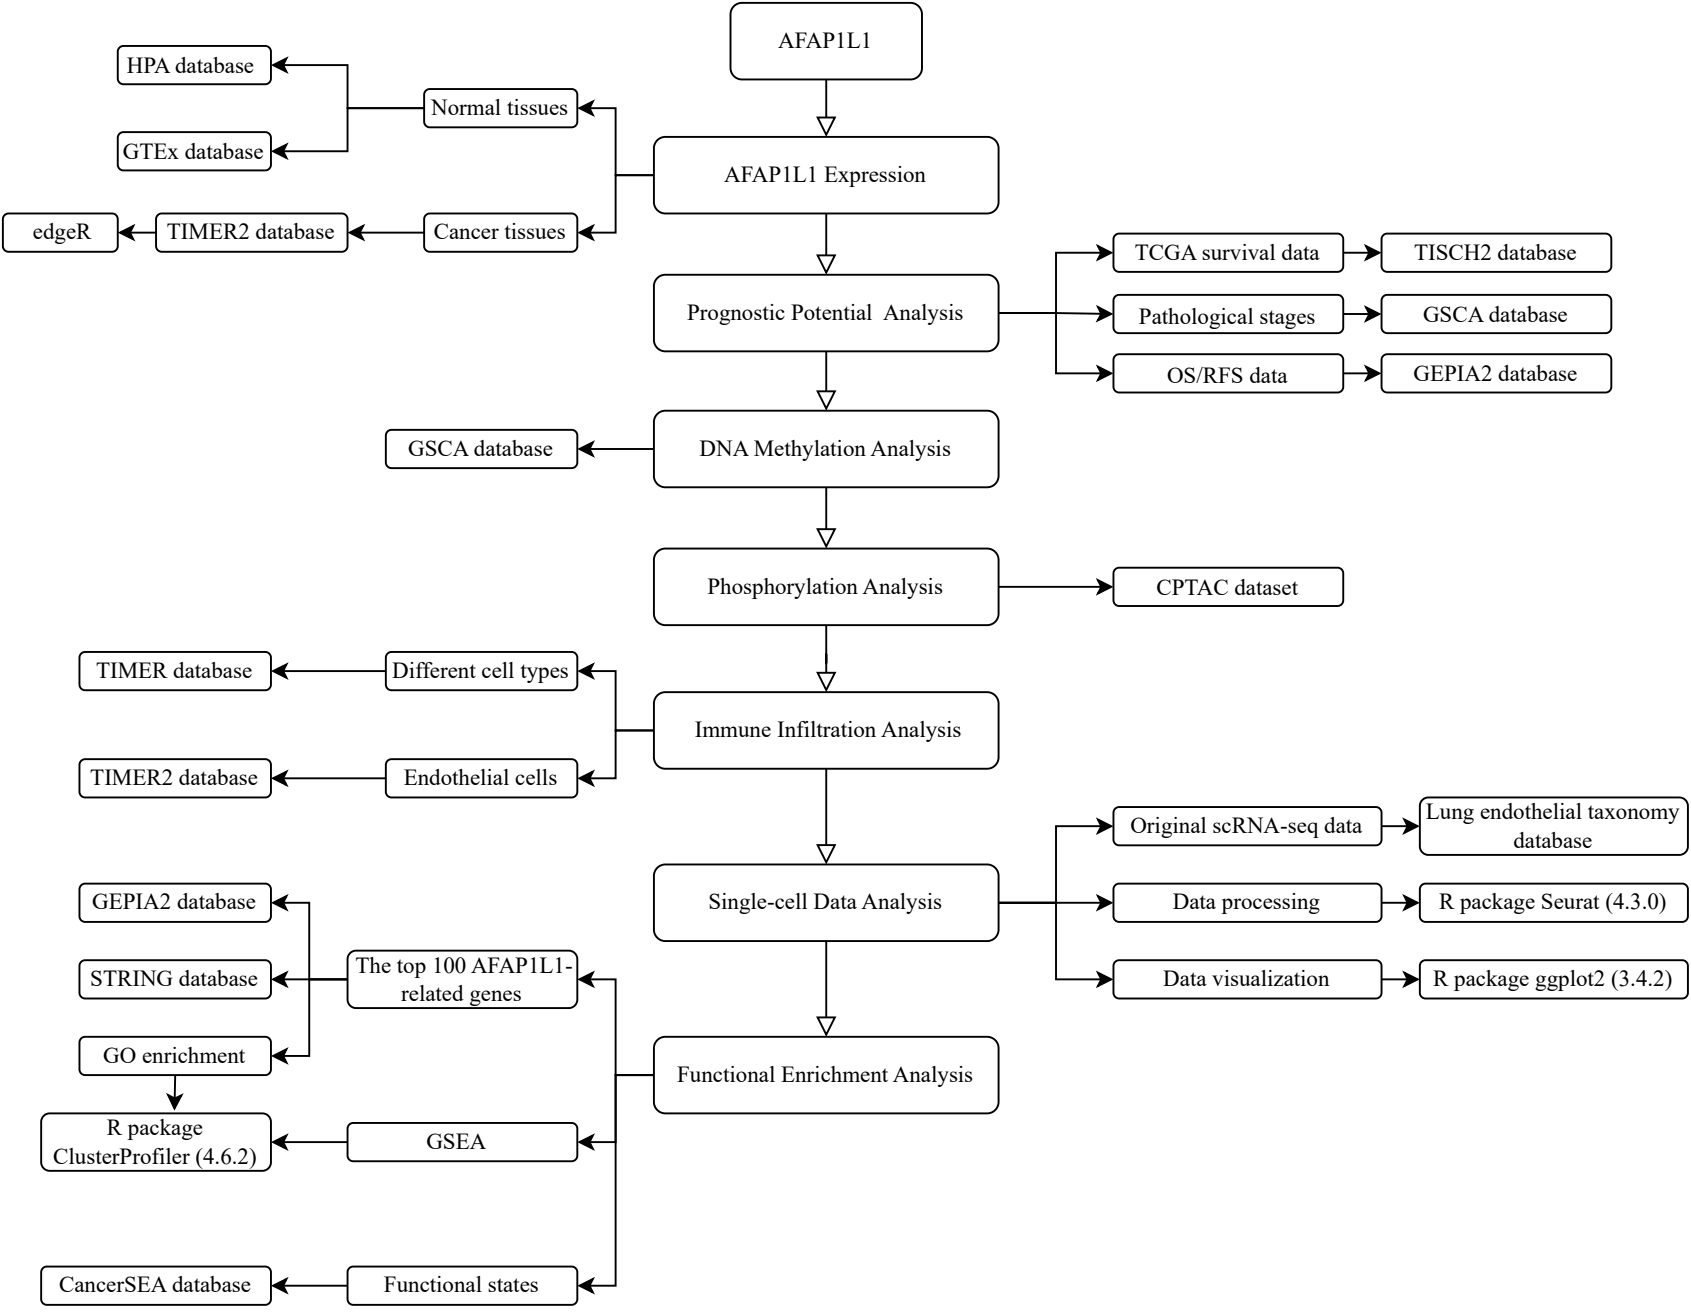

Supplement: MOESM1 [file 12967_2023_4503_MOESM1_ESM.pdf]
